# Supplementary material for: Enhanced Nitric Oxide (NO) and Decreased ADMA Synthesis in Pediatric ADHD and Selective Potentiation of NO Synthesis by Methylphenidate
Source: MDPI journal article supplement (doi:10.3390/jcm9010175), 2020-01-08
Supplement: s1 [file s1]

**Supplement to:**

**Enhanced nitric oxide (NO) and decreased ADMA synthesis in pediatric ADHD and selective potentiation of NO synthesis by methylphenidate**

Kathrin Jansen<sup>1\*</sup>, Beatrice Hanusch<sup>1\*</sup>, Saskia Pross<sup>1,2</sup>, Erik Hanff<sup>3</sup>, Kathrin Drabert<sup>3</sup>, Alexander Bollenbach<sup>3</sup>, Irina Dugave<sup>1,4</sup>, Christina Carmann<sup>1</sup>, Rainer Georg Siefen<sup>1</sup>, Barbara Emons<sup>5,6</sup>, Georg Juckel<sup>5,6</sup>, Tanja Legenbauer<sup>7</sup>, Dimitrios Tsikas<sup>3#</sup>, Thomas Lücke<sup>1#</sup>

**Table S1** Plasma concentrations (median [25<sup>th</sup> – 75<sup>th</sup> interquartile range]) of ADMA, arginine (Arg), nitrate, and nitrite of controls (Co) and ADHD children without (-MPH) and with (+MPH) methylphenidate (MPH) medication

|              | <b>Control</b>   | <b>-MPH</b>      | <b>+MPH</b>      | <b>Statistics</b>                                               | <b>P</b>                |
|--------------|------------------|------------------|------------------|-----------------------------------------------------------------|-------------------------|
| ADMA (μM)    | 0.57 [0.51-0.66] | 0.50 [0.46-0.54] | 0.49 [0.46-0.54] | Co/-MPH: z = -18.9<br>Co/+MPH: z = -19.4<br>-MPH/+MPH: z = 0.60 | .008<br>.01<br>.99      |
| Arg (μM)     | 73.8 ± 17.3      | 68.1 ± 14.3      | 65.2 ± 14.1      | F(2,78) = 2.16                                                  | .12                     |
| Nitrate (μM) | 30.8 [27.0-37.6] | 49.9 [44.8-53.5] | 53.0 [44.1-55.4] | Co/-MPH: z = 23.1<br>Co/+MPH: z = 25.2<br>-MPH/+MPH: z = -2.17  | < .001<br>< .001<br>.99 |
| Nitrite (μM) | 2.12 [0.83-2.32] | 2.44 [2.13-2.8]  | 3.1 [2.78-3.5]   | Co/-MPH: z = 16.7<br>Co/+MPH: z = 35.8<br>-MPH/+MPH: z = -19.1  | .01<br>< .001<br>< .001 |

Normally distributed data (mean ± SDstandard deviation) were calculated with one-way ANOVA; non-normally distributed data (median [25<sup>th</sup> – 75<sup>th</sup> interquartile range]) with Kruskal-Wallis test; corresponding test statistics: F-value (between group df, within-group df), z-score. Arg, Arginine; ADMA, Asymmetric dimethylarginine.

**Table S2** Age-corrected ADMA and nitrite plasma concentrations in ADHD children without (-MPH) and with (+MPH) methylphenidate (MPH) medication

|              | -MPH                      |              | +MPH                      |              |                |     |
|--------------|---------------------------|--------------|---------------------------|--------------|----------------|-----|
|              | Mean <sub>adj</sub> ± SEM | 95% CI       | Mean <sub>adj</sub> ± SEM | 95% CI       | Statistics     | P   |
| ADMA (μM)    | 0.50 ± 0.01               | [0.48; 0.53] | 0.51 ± 0.01               | [0.48; 0.54] | F(1,37) = 0.82 | .77 |
| Nitrite (μM) | 2.67 ± 0.15               | [2.38; 2.97] | 3.16 ± 0.16               | [2.84; 3.48] | F(1,39) = 5.15 | .03 |

One-way ANCOVA adjusted for age. ADMA, Asymmetric dimethylarginine; Mean<sub>adj</sub>, adjusted mean; SEM, standard error of the mean; F-value (between group df, within-group df).

**Table S3** Age-corrected ADMA and nitrite plasma concentration (mean<sub>adj</sub> (SEM) in ADHD children without (-MPH) and with (+MPH) methylphenidate (MPH) medication according to the IQ range of 50 – 100 and above 100 (>100)

| IQ           | -MPH           |              | +MPH           |              | Statistics                                                          | P                         |
|--------------|----------------|--------------|----------------|--------------|---------------------------------------------------------------------|---------------------------|
|              | 50-100 (n = 3) | >100 (n = 8) | 50-100 (n = 9) | >100 (n = 5) |                                                                     |                           |
| ADMA (μM)    | 0.46 (0.02)    | 0.51 (0.01)  | 0.53 (0.01)    | 0.46 (0.02)  | MPH: F(1,20) = 0.41<br>IQ: F(1,20) = 0.17<br>MPH×IQ: F(1,20) = 12.4 | .53<br>.68<br><b>.002</b> |
| Nitrite (μM) | 2.45 (0.40)    | 3.01 (0.24)  | 3.10 (0.22)    | 3.22 (0.27)  | MPH: F(1,21) = 2.14<br>IQ: F(1,21) = 1.12<br>MPH×IQ: F(1,21) = 0.53 | .16<br>.30<br>.47         |

Two-way ANCOVA adjusted for age. ADMA, Asymmetric dimethylarginine; Mean<sub>adj</sub>, adjusted mean; SEM, standard error of the mean; F-value (between group df, within-group df).
